# Supplementary material
Source: HighWire-hosted journal article supplement (https://www.genetics.org/content/suppl/2016/02/19/genetics.115.184234)
Supplement: FileS3.pdf [file FileS3.pdf]

## File S3

### Statistical tests for selective neutrality and hitchhiking of 10 segments with highest CHE scores

For each segment, we denote its two alleles as  $A$  and  $a$ . We consider inducers developed from crosses of type 1 ( $\mathbf{I} \times \mathbf{N}$ ), type 2 ( $(\mathbf{I} \times \mathbf{N}) \times (\mathbf{I} \times \mathbf{N})$ ) or type 3 ( $(\mathbf{I} \times \mathbf{N}) \times \mathbf{I}$ ), where  $\mathbf{I}$  represents an inducer genotype homozygous for presence of the  $A$  allele and  $\mathbf{N}$  is a non-inducer sampled at random from the set of non-inducers which has frequency  $p_A^*$  for allele  $A$  and frequency  $(1 - p_A^*)$  for allele  $a$ . According to the description in Supplementary Table 1, we have 11 crosses of type 1 and 2, and 8 crosses of type 3.

#### The probability of recovering genotype $AA$ in a progeny inducer

The probability of recovering genotype  $AA$  in a progeny inducer  $\mathbf{I}$  descending from one of the three type of crosses described above is given by:

$$P[\mathbf{I} = AA] = p_A^* \times 1 + (1 - p_A^*) \left( \frac{1}{2} + \Delta \right) \quad (1)$$

or 
$$P[\mathbf{I} = AA] = p_A^* \times 1 + (1 - p_A^*) \left( \frac{3}{4} + \Delta \right) \quad (2)$$

where  $\Delta$  corresponds to the change in the frequency of allele  $A$  due to directional selection for HI in the development of progeny inducers for  $\mathbf{I}$  descending from a cross of type 1 or 2 (Eqn. (1) and a cross of type 3 (Eqn.(2)).

#### Null hypothesis and alternative hypothesis

The biological hypothesis that allele  $A$  is selectively neutral, corresponds to the null hypothesis  $H_0$ :  $\Delta = 0$ , whereas the alternative hypothesis  $H_1$ :  $\Delta > 0$  corresponds to the statement that allele  $A$  was selected for and, as a result, its frequency increased.

#### Test for selection of allele $A$ at a specific locus

For a specific segment detected in the inducers, the frequency  $p_A^*$ , which corresponds to the probability that a randomly chosen non-inducer carries this haplotype, and can be directly obtained from Table 1. Thus, using Eqns. (1) and (2), the probability of observing genotype  $AA$  in a newly developed inducer at the locus under investigation is given by the expression

$$f(\Delta) = \left[ p_A^* \times 1 + (1 - p_A^*) \left( \frac{1}{2} + \Delta \right) \right]^{11} \left[ p_A^* \times 1 + (1 - p_A^*) \left( \frac{3}{4} + \Delta \right) \right]^8 \quad (3)$$

By solving the equation  $f(\Delta) = \alpha$ , we obtain the lower limit  $\Delta_u$  of the  $(1-\alpha)\%$  Clopper-Pearson confidence

interval (Clopper and Pearson 1934), corresponding to a statistical test of  $H_0$  at the significance level  $\alpha$ . If  $\Delta_u > 0$ , we reject the null hypothesis  $H_0$  based on our experimental data, indicating there is a positive selection at this locus; otherwise, we accept the null hypothesis, indicating that allele  $A$  is selectively neutral.

In this study, we used the significance level  $\alpha=0.01$  and  $0.001$  and the Bonferroni adjusted multiple testing significance level  $\alpha=0.001$  and  $0.0001$  for the top 10 segments with the highest CHE score (Table 1).
